# Supplementary material
Source: publisher site journal article supplement (https://www.spandidos-publications.com/3437/downloadSupplementary)

Figure S1. Lentiviral packaging systems. (A) Four-plasmid system for LV5 lentivirus. (B) Four-plasmid system for LV3 lentivirus.

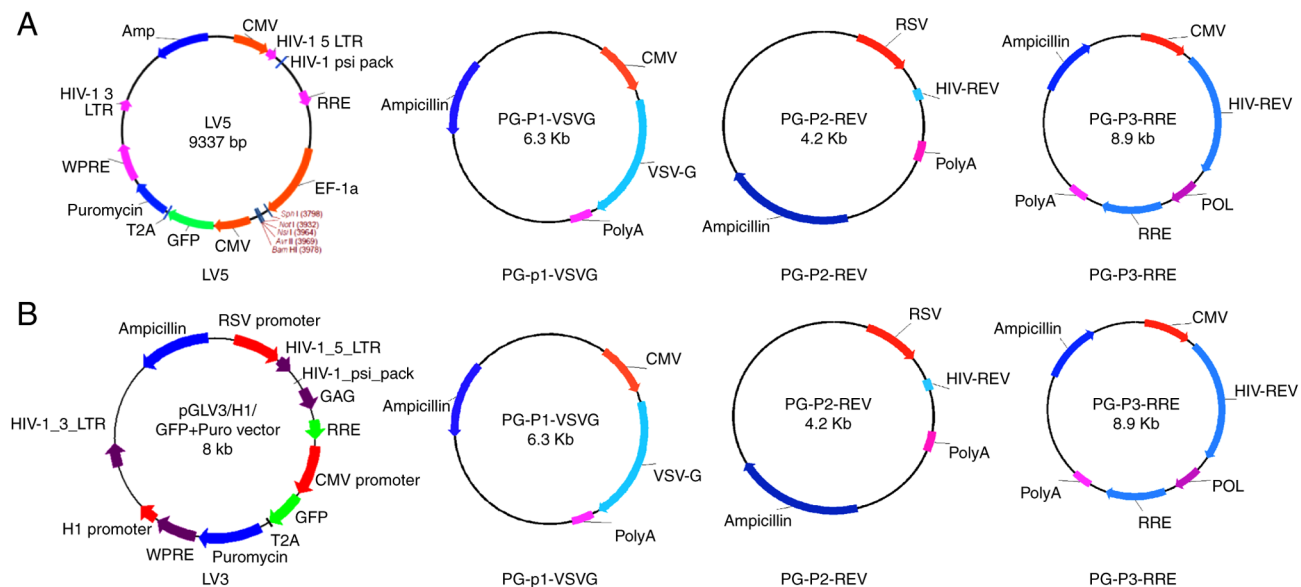

Supplement: Supplementary file 1 [file downloadSupplementary]
